# Supplementary material for: The CNT modified white C3N4 composite photocatalyst with enhanced visible-light response photoactivity
Source: Royal Society of Chemistry journal article supplement (doi:10.1039/c3dt32871f), 2013-01-01
Supplement: c3dt32871f.pdf [file c3dt32871f.pdf]

## Supporting information

# The CNT modified white C<sub>3</sub>N<sub>4</sub> composite photocatalyst with enhanced visible-light response photoactivity

Yuanguo Xu,<sup>a,b</sup> Hui Xu,<sup>a</sup> Lei Wang,<sup>a</sup> Jia Yan,<sup>b</sup> Huaming Li,<sup>\*b</sup> Yanhua Song,<sup>b</sup> Liying Huang,<sup>b</sup>  
Guobin Cai<sup>b</sup>

<sup>a</sup> *School of the Environment, Jiangsu University, 301 Xuefu Road, Zhenjiang, 212013, P R  
China*

<sup>b</sup> *School of Chemistry and Chemical Engineering, Jiangsu University, 301 Xuefu Road,  
Zhenjiang, 212013, P R China*

Fig. S1 shows the same amount of  $C_3N_4$  (Fig. S1 A) and the white  $C_3N_4$  (Fig. S1 B) dispersed in 4 mL water (in the 5 ml tube) respectively and precipitated at the same time. It is obvious that the white  $C_3N_4$  disperses much better than  $C_3N_4$  in the water. The  $C_3N_4$  precipitates a lot while white  $C_3N_4$  does not precipitate obviously.

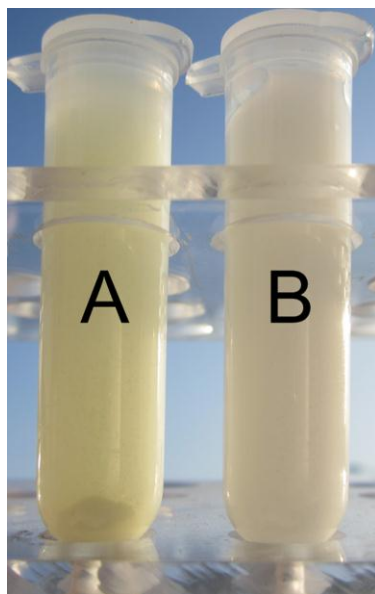

**Fig. S1** The photograph of  $C_3N_4$  (A) and white  $C_3N_4$  (B) dispersing in the water and precipitating at the same time.

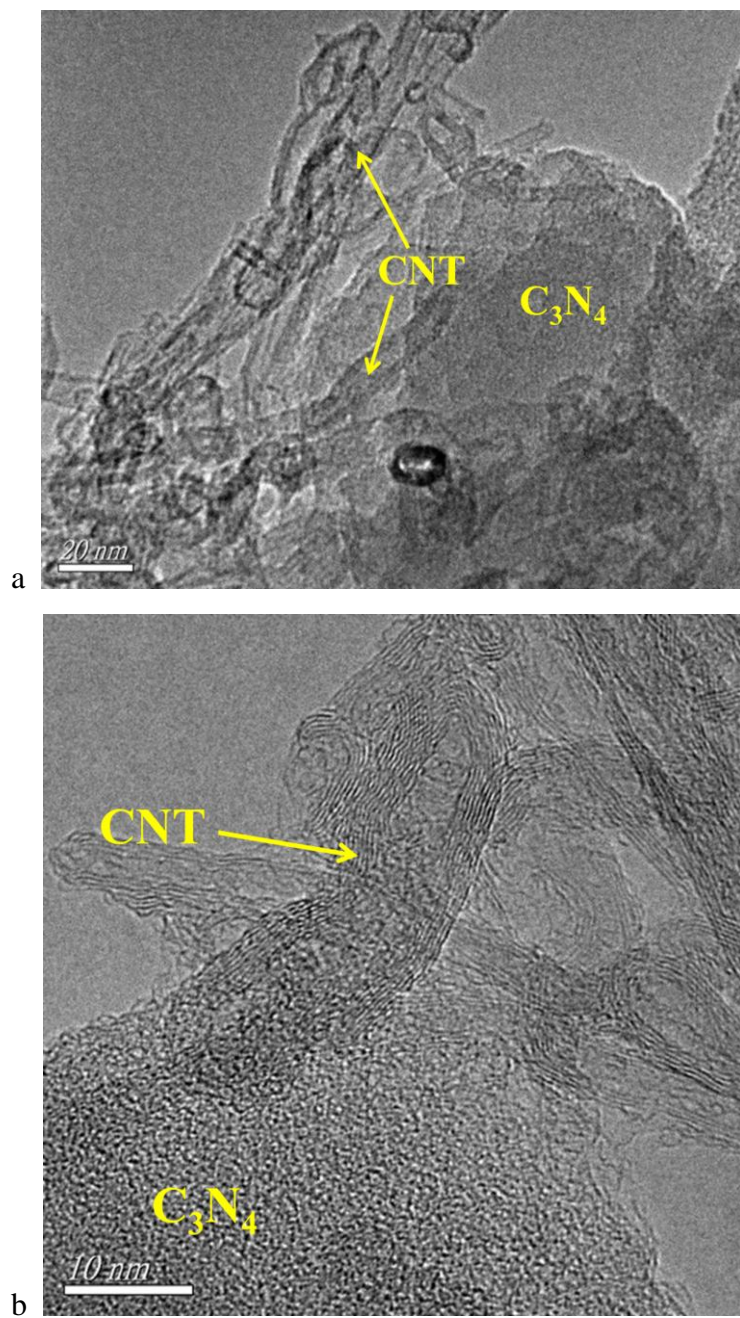

**Fig. S2** TEM image (a) and HRTEM image (b) of CNT/white C<sub>3</sub>N<sub>4</sub> with CNT content

about 0.475 wt %.

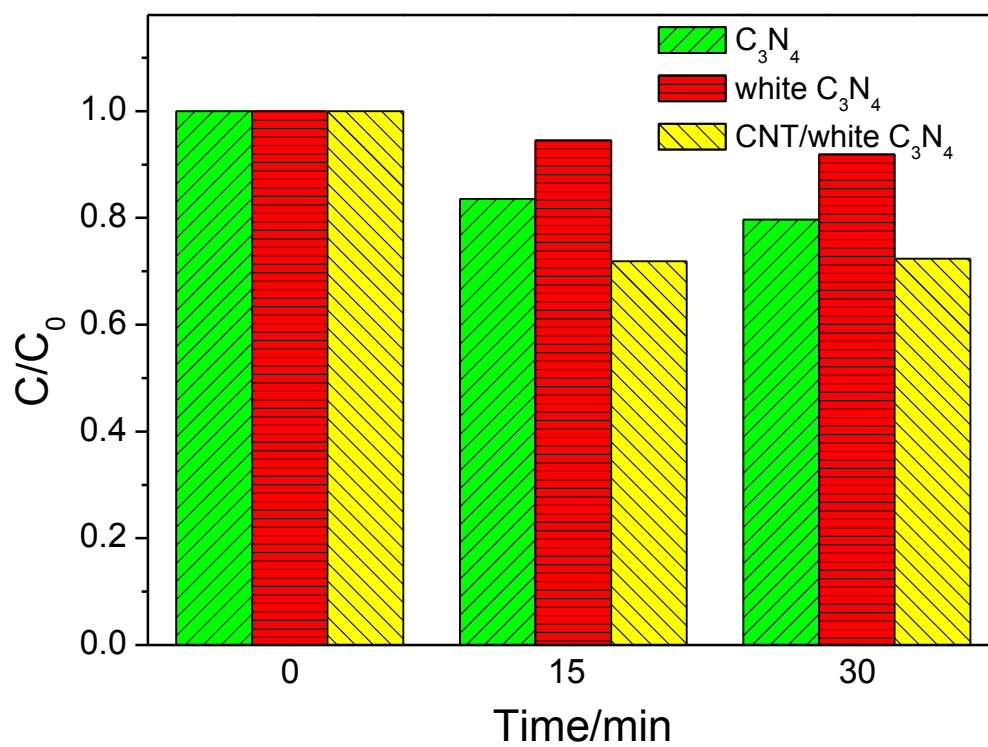

**Fig. S3** Time profiles of adsorption of MB over the catalysts in the dark.
